# Supplementary material
Source: publisher site journal article supplement (https://www.dovepress.com/article/380470)
Supplement: Supplementary file 1 [file get_supplementary_file.php]

**APPENDIX**

**Kompleksowa Skala Pokory Intelektualnej**

(Kroplewski, Krumrei-Mancuso, Bielecka, & Szcześniak, 2022)

**Instrukcja**: Uważnie zapoznaj się z każdym zdaniem i podaj, w jakim stopniu się z nim zgadzasz.

Pozycje są oceniane według 5-punktowej skali Likerta:

1 = zdecydowanie nie zgadzam się,

2 = nie zgadzam się,

3 = nie mam zdania,

4 = zgadzam się,

5 = zdecydowanie zgadzam się.

| 1. My ideas are usually better than other people’s ideas.*  Moje pomysły zwykle są lepsze niż pomysły innych ludzi.* |
| --- |
| 2. For the most part, others have more to learn from me than I have to learn from them.*  Przeważnie inni uczą się ode mnie więcej niż ja od nich.* |
| 3. When I am really confident in a belief, there is very little chance that the belief is wrong.*  Gdy jestem o czymś mocno przekonany(a), istnieje bardzo mała szansa, że się mylę.* |
| 4. I’d rather rely on my own knowledge about most topics than turn to others for expertise.*  W większości tematów wolę polegać na swojej wiedzy niż zasięgnąć opinii u innych.* |
| 5. On important topics, I am not likely to be swayed by the viewpoints of others.*  W ważnych kwestiach jest mało prawdopodobne, aby opinia innych przekonała mnie do zmiany zdania.* |
| 6. I have at times changed opinions that were important to me, when someone showed me I was wrong.  Zdarzało mi się zmienić zdanie na temat, który był dla mnie ważny, gdy ktoś pokazał mi, że się mylę. |
| 7. I am willing to change my position on an important issue in the face of good reasons.  Jestem skłonny(a) zmienić zdanie na ważny temat, jeśli istnieją ku temu uzasadnione powody. |
| 8. I am open to revising my important beliefs in the face of new information.  Jestem otwarty(a) na zmianę swoich przekonań na ważne tematy w świetle nowych informacji. |
| 9. I am willing to change my opinions on the basis of compelling reason.  Jestem skłonny(a) zmienić swoje zdanie, gdy istnieje ku temu przekonujący powód. |
| 10. I’m willing to change my mind once it’s made up about an important topic.  Jestem skłonny(a) zmienić swoje zdanie na temat ważnej kwestii, w której już wyrobiłem(am) sobie opinię. |
| 11. I respect that there are ways of making important decisions that are different from the way I make decisions.  Rozumiem, że istnieje wiele sposobów na podjęcie ważnych decyzji, które różnią się od sposobu w jaki ja podejmuję decyzje. |
| 12. Listening to perspectives of others seldom changes my important opinions.*  Wysłuchanie poglądów innych osób rzadko wpływa na mój pogląd na ważny temat.* |
| 13. I welcome different ways of thinking about important topics.  Jestem otwarty(a) na inne sposoby myślenia o ważnych tematach. |
| 14. I can have great respect for someone, even when we don’t see eye-to-eye on important topics.  Mogę darzyć drugą osobę wielkim szacunkiem, nawet jeśli nasze opinie na ważne tematy różnią się. |
| 15. Even when I disagree with others, I can recognize that they have sound points.  Nawet jeśli nie zgadzam się z innymi, potrafię przyznać, że niektóre ich argumenty są trafne. |
| 16. When someone disagrees with ideas that are important to me, it feels as though I’m being attacked.*  Kiedy ktoś nie zgadza się z istotnymi dla mnie ideami, mam wrażenie, że jestem atakowany(a).* |
| 17. When someone contradicts my most important beliefs, it feels like a personal attack.*  Gdy ktoś zaprzecza moim najistotniejszym przekonaniom, odbieram to jako atak na moją osobę.* |
| 18. I tend to feel threatened when others disagree with me on topics that are close to my heart.*  Zazwyczaj czuję się zagrożony(a) gdy inni nie zgadzają się ze mną w kwestiach bliskich mojemu sercu.* |
| 19. I can respect others, even if I disagree with them in important ways.  Mogę traktować innych z szacunkiem, nawet jeśli nie zgadzają się ze mną w ważnych kwestiach. |
| 20. I am willing to hear others out, even if I disagree with them.  Jestem skłonny(a) wysłuchać innych, nawet jeśli się z nimi nie zgadzam. |
| 21. When someone disagrees with ideas that are important to me, it makes me feel insignificant.*  Gdy ktoś nie zgadza się ze mną w ważnych dla mnie kwestiach, czuję się mało znaczący(a).* |
| 22. I feel small when others disagree with me on topics that are close to my heart.*  Gdy inni nie zgadzają się ze mną w przypadku tematów bliskich mojemu sercu, to czuję się gorszy(a).* |

* reverse-coded items

Scoring: Independence of Intellect and Ego: 16*, 17*, 18*, 21*, 22*; Openness to Revising One’s Viewpoint: 6, 7, 8, 9, 10; Respect for Others’ Viewpoints: 11, 13, 14, 15, 19, 20; Lack of Intellectual Overconfidence: 1*, 2*, 3*, 4*, 5*, 12*

Notes: CHIS English translation from Krumrei-Mancuso EJ, Rouse SV. The development and validation of the comprehensive intellectual humility scale. *J Pers Assess*. 2016;98(2):209–221. by permission of the publisher (Taylor & Francis Ltd, http://www.tandfonline.com).2
